# Supplementary material for: Milk Exosomal miR-27b Worsen Endoplasmic Reticulum Stress Mediated Colorectal Cancer Cell Death
Source: MDPI journal article supplement (doi:10.3390/nu14235081), 2022-11-29
Supplement: s1 [file s1]

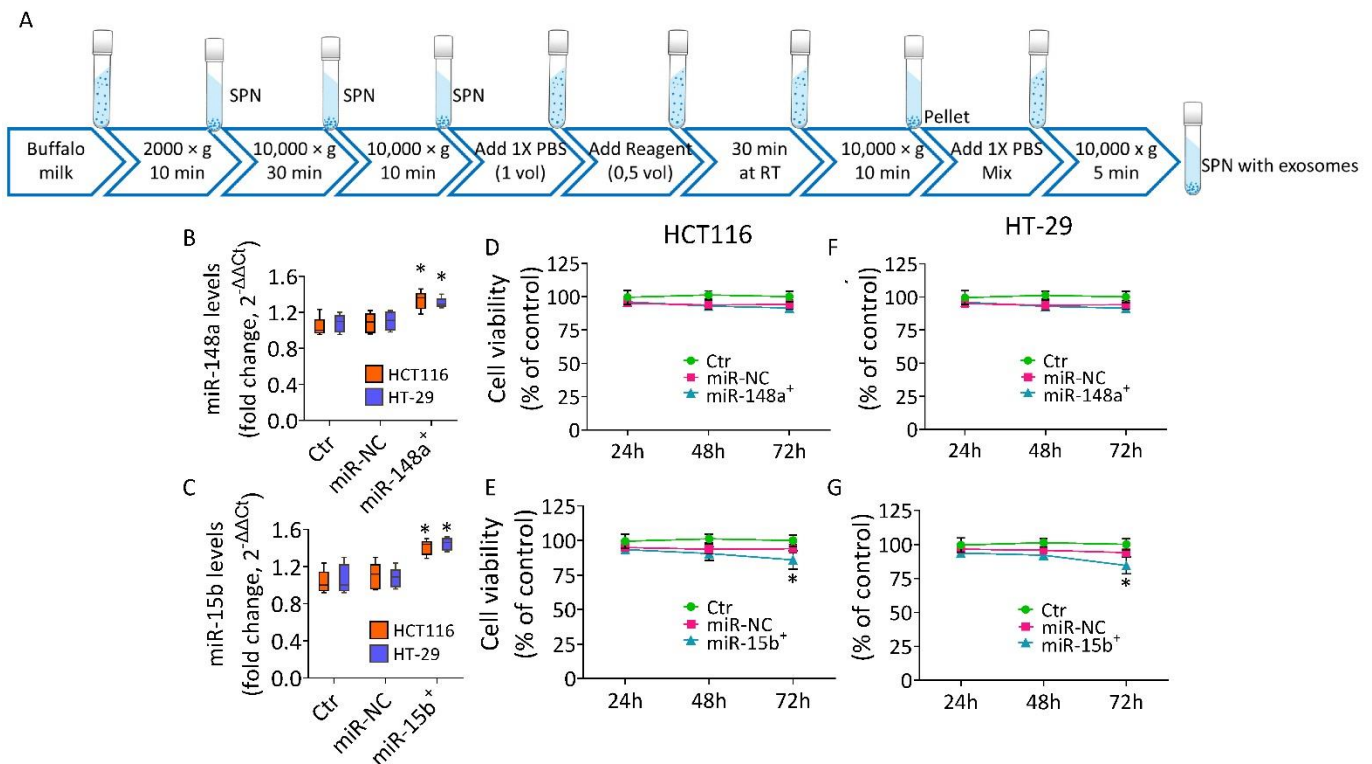

**Supplementary Figure S1:** Milk-derived miRNA cytotoxicity. (A) Flow chart showing milk exosome miRNA isolation and characterization. The relative expression of (B) miR-148a and (C) miR-15b, analyzed by qRT-PCR and normalized with U6 as endogenous control, in HCT116 and HT-29 transfected with 30 nM mimic Negative Control (miR-NC), miR-148a mimic (miR-148a<sup>+</sup>), and miR-15b mimic (miR15b<sup>+</sup>). MiRNA levels are reported as floating bars with a line representing the mean  $\pm$  SD. (D,E) HCT116 and (F,G) HT-29 cells were transfected with 30 nM mimic Negative Control (miR-NC), miR-148a mimic (miR-148a<sup>+</sup>), and miR-15b mimic (miR15b<sup>+</sup>) and cell viability, assessed using Cell Counting Kit-8 assay, expressed as % of control of  $n = 4$  independent. Control cells (Ctr) were treated with the corresponding highest volume of HBSS-10 mM Hepes. \* $p < 0.05$  vs. miR-NC.

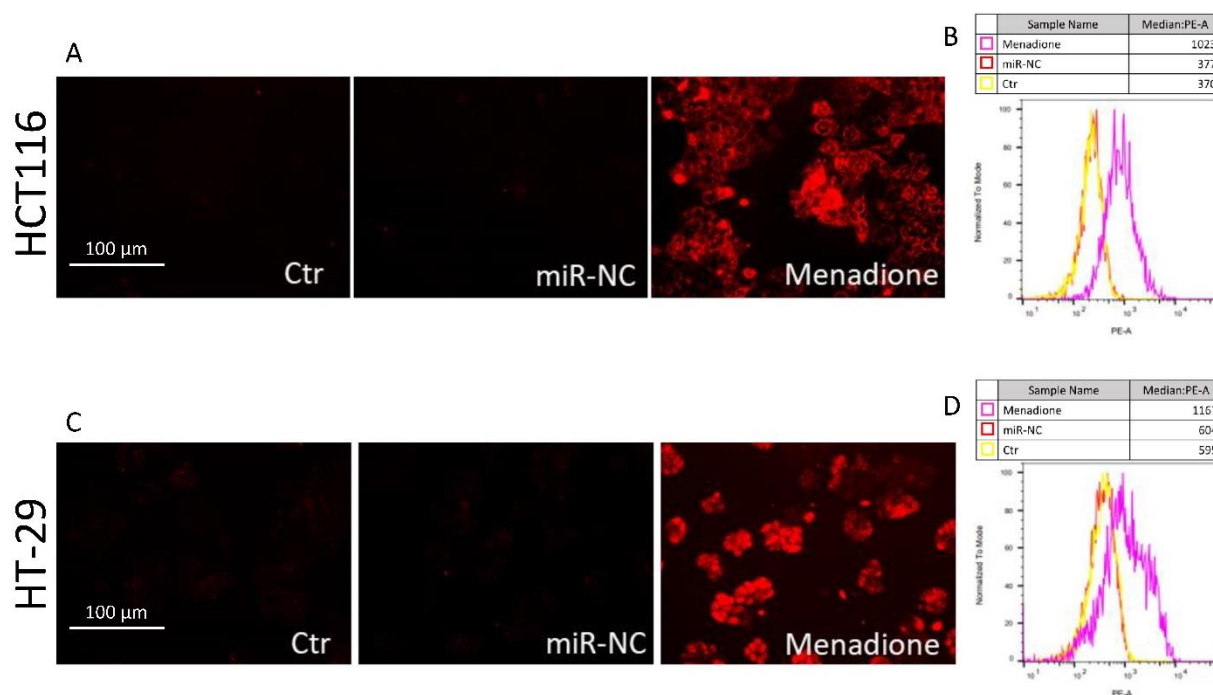

**Supplementary Figure S2:** Oxidative stress controls. Representative images and cytometer analyses, expressed as red fluorescence median, of mitochondrial ROS detection in (A,B) HCT116 and (C,D) HT-29 transfected with 30 nM mimic Negative Control (miR-NC) or treated for 1h with the ROS inducer menadione (100 µM). Control cells (Ctr) were treated with the corresponding highest volume of HBSS-10 mM Hepes. Scale bars = 100 µm.

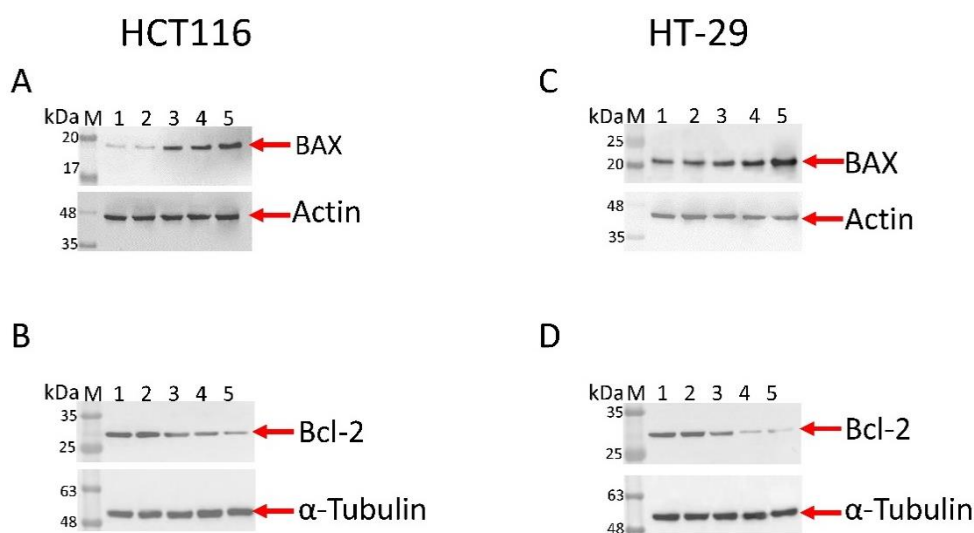

**Supplementary Figure S3:** Apoptotic markers. Representative cropped blots of BAX, Bcl-2 and their internal controls (actin and α-tubulin) in (A,B) HCT116 and (C,D) HT-29 cells transfected with 30 nM mimic Negative Control (miR-NC) and miR-27b mimic (miR-27b<sup>+</sup>) or with miR-NC and miR-27b<sup>+</sup> before 72h with 40% v/v milk treatment (miR-NC+Milk and miR-27b<sup>+</sup>+Milk). Control cells (Ctr) were treated with the corresponding highest volume of HBSS-10 mM Hepes. M = weight markers; Lane 1 = Ctr; lane 2 = miR-NC; lane 3 = miR-NC+Milk; lane 4 = miR-27b<sup>+</sup>; lane 5 = miR-27b<sup>+</sup>+Milk.

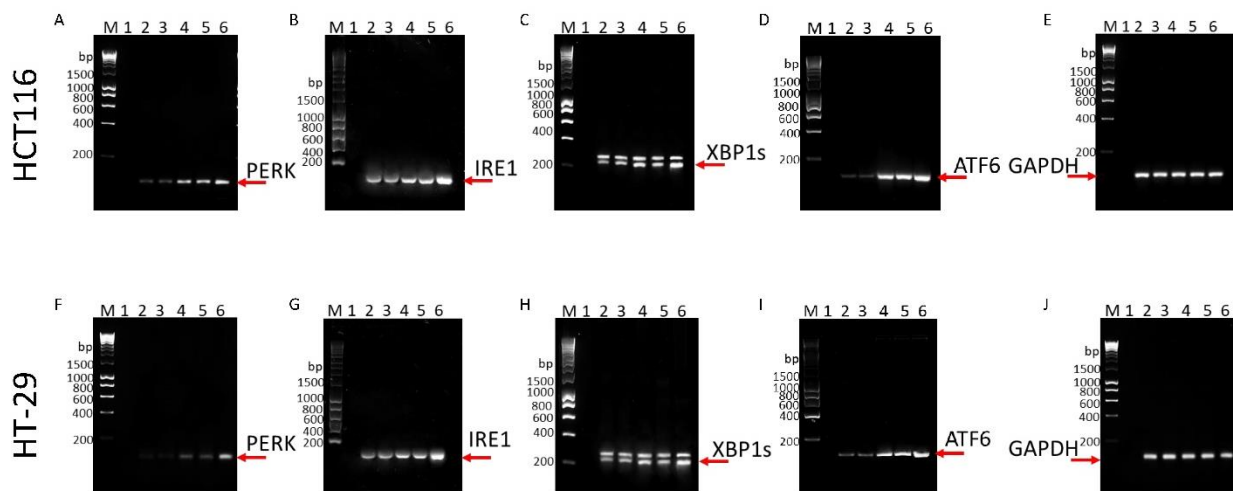

**Supplementary Figure S4:** mRNA levels of ER-stress markers. Representative PCR products of GAPDH (internal control), PERK, XBP1s, IRE1, and ATF6 in (A–E) HCT116 and (F–J) HT-29 cells transfected with 30 nM mimic Negative Control (miR-NC) and miR-27b mimic (miR-27b<sup>+</sup>) or with miR-NC and miR-27b<sup>+</sup> before 72h with 40% v/v milk treatment (miR-NC+Milk and miR-27b<sup>+</sup>+Milk). Control cells (Ctr) were treated with the corresponding highest volume of HBSS-10 mM Hepes. M = molecular markers; Lane 1 = negative control lacking cDNA template; Lane 2 = Ctr; lane 3 = miR-NC; lane 4 = miR-NC+Milk; lane 5 = miR-27b<sup>+</sup>; lane 6 = miR-27b<sup>+</sup>+Milk. The amplified transcripts are shown with the expected sizes on 2.0% agarose gels.

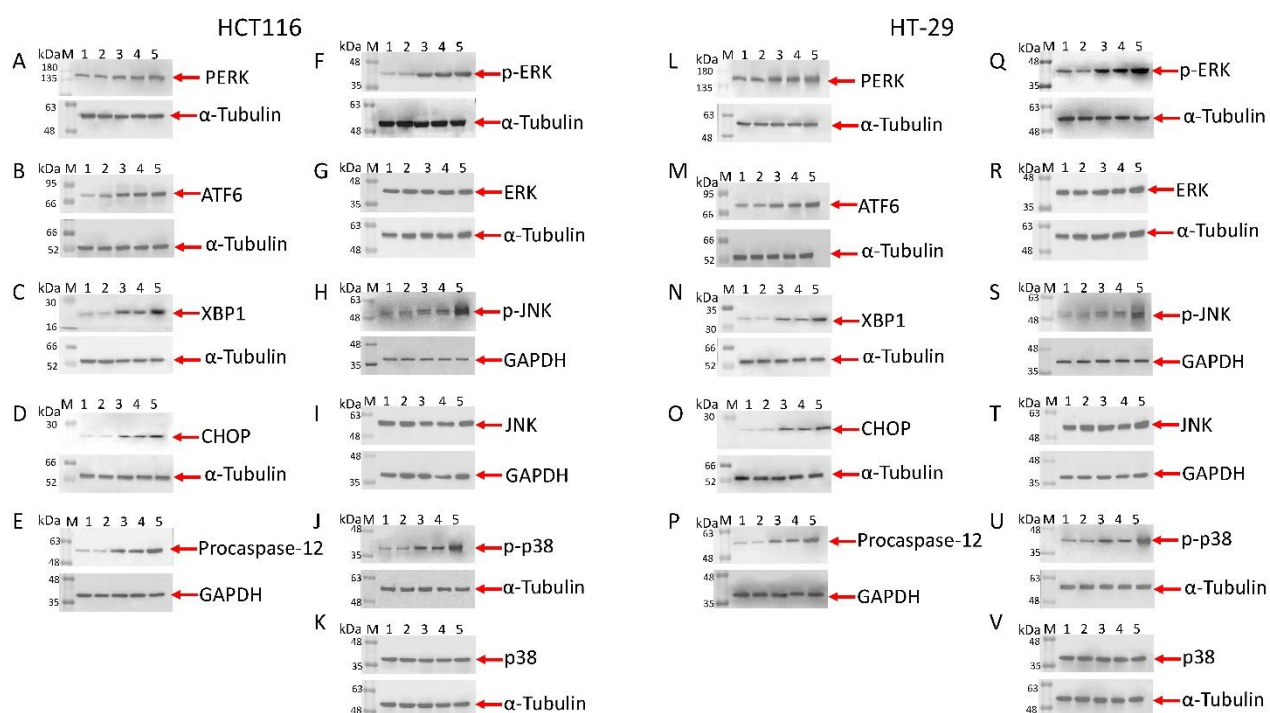

**Supplementary Figure S5:** ER-stress markers. Representative cropped blots of PERK, ATF6, XBP1, CHOP, procaspase-12, phospho-ERK, ERK, phospho-JNK, JNK, phospho-p38, p38, and their internal controls (GAPDH and  $\alpha$ -tubulin) in (A–K) HCT116 and (L–V) HT-29 cells transfected with 30 nM mimic Negative Control (miR-NC) and miR-27b mimic (miR-27b<sup>+</sup>) or with miR-NC and miR-27b<sup>+</sup> before 72h with 40% v/v milk treatment (miR-NC+Milk and miR-27b<sup>+</sup>+Milk). Control cells (Ctr) were treated with the corresponding highest volume of HBSS-10 mM Hepes. M = weight markers; Lane 1 = Ctr; lane 2 = miR-NC; lane 3 = miR-NC+Milk; lane 4 = miR-27b<sup>+</sup>; lane 5 = miR-27b<sup>+</sup>+Milk.

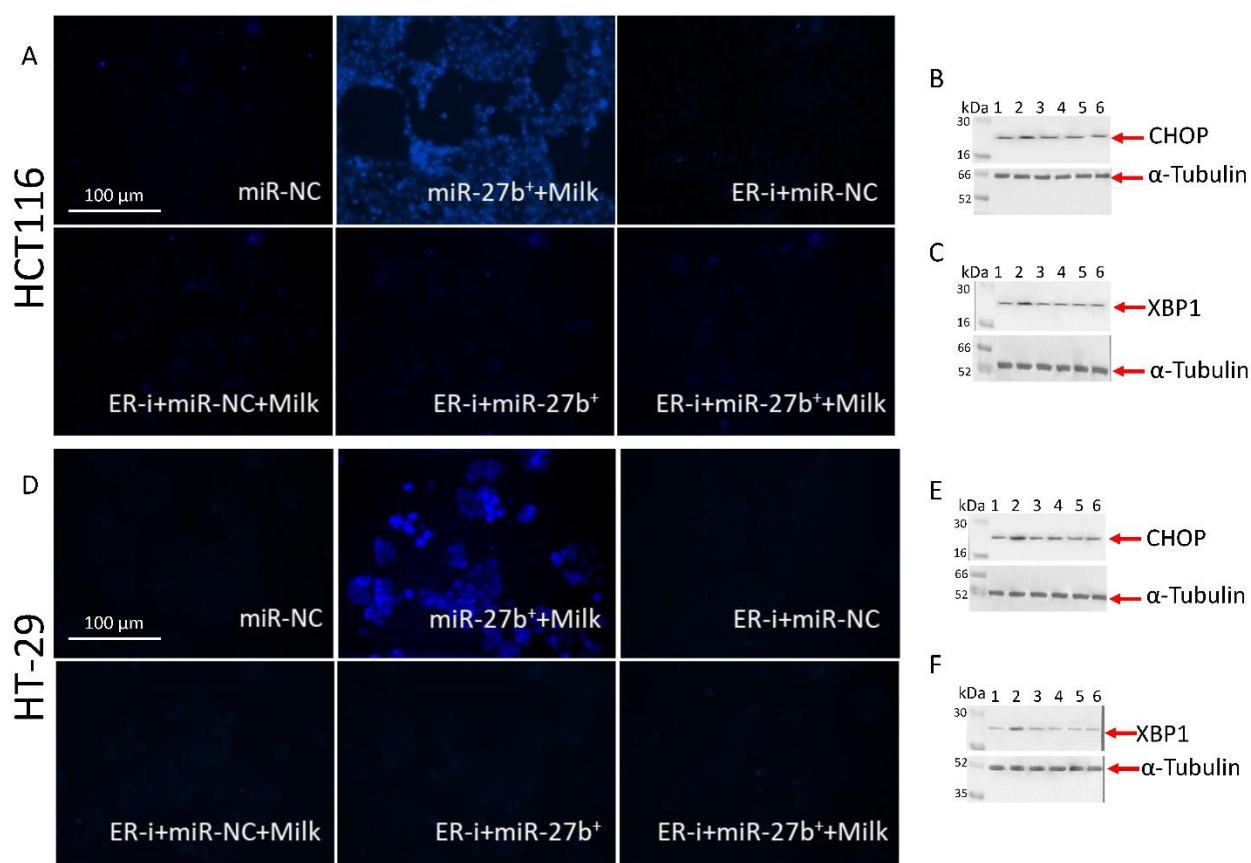

**Supplementary Figure S6:** ER-i effects. Representative images by fluorescence microscopy and cropped blots of CHOP, XBP1, and the internal control ( $\alpha$ -tubulin) in (A–C) HCT116 and (D–F) HT-29 cells transfected with 30 nM mimic Negative Control (miR-NC) and miR-27b mimic before 72h with 40% v/v milk treatment (miR-27b<sup>+</sup>+Milk) or incubated for 1h with 2  $\mu$ M GSK2606414 (ER-i) and then transfected with miR-NC (ER-i+miR-NC) or with miR-27b<sup>+</sup> (ER-i+miR-27b<sup>+</sup>) before milk incubation (ER-i+miR-NC+Milk and ER-i+miR-27b<sup>+</sup>+Milk). Scale bars = 100  $\mu$ m. M = weight markers; Lane 1 = miR-NC; lane 2 = miR-27b<sup>+</sup>+Milk; lane 3 = ER-i+miR-NC; lane 4 = ER-i+miR-NC+Milk; lane 5 = ER-i+miR-27b<sup>+</sup>; lane 6 = ER-i+miR-27b<sup>+</sup>+Milk.
